# Supplementary material for: Complete chloroplast genome studies of different apple varieties indicated the origin of modern cultivated apples from Malus sieversii and Malus sylvestris
Source: PeerJ. 2022 Mar 18;10:e13107. doi: 10.7717/peerj.13107 (PMC8935992; doi:10.7717/peerj.13107)
Supplement: Supplemental Information 4 [file peerj-10-13107-s004.docx]

|  |  | **Red Delicious** | | | | | |
| --- | --- | --- | --- | --- | --- | --- | --- |
| Phe | UUU | 1.26 | 1.25 | 1.22 | 1.25 | 1.27 | 1.25 |
| UUC | 0.74 | 0.75 | 0.78 | 0.75 | 0.73 | 0.75 |
| Leu | UUA | 1.47 | 1.4 | 1.35 | 1.4 | 1.51 | 1.4 |
| UUG | 1.19 | 1.22 | 1.29 | 1.22 | 1.17 | 1.22 |
| CUU | 1.28 | 1.29 | 1.22 | 1.29 | 1.28 | 1.29 |
| CUC | 0.68 | 0.76 | 0.73 | 0.76 | 0.74 | 0.76 |
| CUA | 0.85 | 0.81 | 0.84 | 0.81 | 0.81 | 0.81 |
| CUG | 0.53 | 0.51 | 0.57 | 0.51 | 0.5 | 0.51 |
| Ile | AUU | 1.23 | 1.24 | 1.19 | 1.24 | 1.26 | 1.24 |
| AUC | 0.67 | 0.7 | 0.71 | 0.7 | 0.69 | 0.7 |
| AUA | 1.11 | 1.06 | 1.1 | 1.06 | 1.05 | 1.06 |
| Met | AUG | 1 | 1 | 1 | 1 | 1 | 1 |
| Val | GUU | 1.38 | 1.4 | 1.34 | 1.4 | 1.41 | 1.4 |
| GUC | 0.7 | 0.73 | 0.71 | 0.73 | 0.71 | 0.73 |
| GUA | 1.23 | 1.21 | 1.21 | 1.21 | 1.22 | 1.21 |
| GUG | 0.69 | 0.65 | 0.74 | 0.65 | 0.66 | 0.65 |
| Ser | UCU | 1.48 | 1.46 | 1.44 | 1.46 | 1.47 | 1.46 |
| UCC | 1.08 | 1.09 | 1.18 | 1.09 | 1.06 | 1.09 |
| UCA | 1.25 | 1.14 | 1.11 | 1.14 | 1.17 | 1.14 |
| UCG | 0.79 | 0.78 | 0.81 | 0.78 | 0.78 | 0.78 |
| AGU | 0.84 | 1.09 | 1.04 | 1.09 | 1.14 | 1.09 |
| AGC | 0.56 | 0.96 | 1.03 | 0.96 | 0.95 | 0.96 |
| Pro | CCU | 1.09 | 1.27 | 1.22 | 1.27 | 1.23 | 1.27 |
| CCC | 0.97 | 0.68 | 0.71 | 0.68 | 0.69 | 0.68 |
| CCA | 1.24 | 1.27 | 1.1 | 1.27 | 1.27 | 1.27 |
| CCG | 0.7 | 0.93 | 1.08 | 0.93 | 0.92 | 0.93 |
| Thr | ACU | 1.22 | 1.13 | 1.14 | 1.13 | 1.14 | 1.13 |
| ACC | 0.98 | 0.67 | 0.68 | 0.67 | 0.67 | 0.67 |
| ACA | 1.16 | 1.32 | 1.25 | 1.32 | 1.34 | 1.32 |
| ACG | 0.64 | 0.96 | 0.93 | 0.96 | 0.92 | 0.96 |
| Ala | GCU | 1.28 | 1.1 | 1.11 | 1.1 | 1.1 | 1.1 |
| GCC | 0.91 | 0.62 | 0.71 | 0.62 | 0.64 | 0.62 |
| GCA | 1.18 | 1.39 | 1.36 | 1.39 | 1.41 | 1.39 |
| GCG | 0.63 | 0.61 | 0.64 | 0.61 | 0.59 | 0.61 |
| Tyr | UAU | 1.41 | 1.36 | 1.31 | 1.36 | 1.31 | 1.36 |
| UAC | 0.59 | 0.67 | 0.74 | 0.67 | 0.69 | 0.67 |
| ✱ | UAA | 1.34 | 1.43 | 1.45 | 1.43 | 1.43 | 1.43 |
| UAG | 0.71 | 0.57 | 0.55 | 0.57 | 0.57 | 0.57 |
| UGA | 0.95 | 1.43 | 1.4 | 1.43 | 1.43 | 1.43 |
| His | CAU | 1.45 | 0.57 | 0.6 | 0.57 | 0.57 | 0.57 |
| CAC | 0.55 | 1.44 | 1.4 | 1.44 | 1.44 | 1.44 |
| Gln | CAA | 1.4 | 0.56 | 0.6 | 0.56 | 0.56 | 0.56 |
| CAG | 0.6 | 1.41 | 1.35 | 1.41 | 1.42 | 1.41 |
| Asn | AAU | 1.44 | 0.59 | 0.65 | 0.59 | 0.58 | 0.59 |
| AAC | 0.56 | 1.45 | 1.47 | 1.45 | 1.46 | 1.45 |
| Lys | AAA | 1.41 | 0.55 | 0.53 | 0.55 | 0.54 | 0.55 |
| AAG | 0.59 | 1.35 | 1.4 | 1.35 | 1.37 | 1.35 |
| Asp | GAU | 1.47 | 0.65 | 0.6 | 0.65 | 0.63 | 0.65 |
| GAC | 0.53 | 1.27 | 1.24 | 1.27 | 1.26 | 1.27 |
| Glu | GAA | 1.38 | 0.73 | 0.76 | 0.73 | 0.74 | 0.73 |
| GAG | 0.62 | 0.97 | 0.95 | 0.97 | 1 | 0.97 |
| Cys | UGU | 1.28 | 1 | 1 | 1 | 1 | 1 |
| UGC | 0.72 | 0.73 | 0.67 | 0.73 | 0.74 | 0.73 |
| Trp | UGG | 1 | 0.46 | 0.52 | 0.46 | 0.45 | 0.46 |
| Arg | CGU | 0.73 | 1.09 | 1.02 | 1.09 | 1.11 | 1.09 |
| CGC | 0.47 | 0.76 | 0.7 | 0.76 | 0.77 | 0.76 |
| CGA | 1.09 | 0.91 | 0.84 | 0.91 | 0.91 | 0.91 |
| CGG | 0.77 | 0.62 | 0.62 | 0.62 | 0.62 | 0.62 |
| AGA | 1.85 | 1.86 | 1.95 | 1.86 | 1.86 | 1.86 |
| AGG | 1.09 | 1.11 | 1.14 | 1.11 | 1.08 | 1.11 |
| Gly | GGU | 0.96 | 0.95 | 1.01 | 0.95 | 0.92 | 0.95 |
| GGC | 0.69 | 0.65 | 0.66 | 0.65 | 0.66 | 0.65 |
| GGA | 1.36 | 1.4 | 1.35 | 1.4 | 1.42 | 1.4 |
| GGG | 0.99 | 1 | 0.98 | 1 | 1 | 1 |

|  |  | **Golden Delicious** | | | | | |
| --- | --- | --- | --- | --- | --- | --- | --- |
| Phe | UUU | 1.27 | 1.25 | 1.23 | 1.25 | 1.25 | 1.26 |
| UUC | 0.73 | 0.75 | 0.77 | 0.75 | 0.75 | 0.74 |
| Leu | UUA | 1.51 | 1.43 | 1.32 | 1.43 | 1.43 | 1.51 |
| UUG | 1.17 | 1.25 | 1.23 | 1.25 | 1.25 | 1.16 |
| CUU | 1.28 | 1.18 | 1.23 | 1.18 | 1.18 | 1.2 |
| CUC | 0.74 | 0.75 | 0.76 | 0.75 | 0.75 | 0.66 |
| CUA | 0.81 | 0.85 | 0.89 | 0.85 | 0.86 | 0.95 |
| CUG | 0.5 | 0.54 | 0.57 | 0.54 | 0.54 | 0.53 |
| Ile | AUU | 1.26 | 1.21 | 1.22 | 1.21 | 1.21 | 1.23 |
| AUC | 0.69 | 0.7 | 0.73 | 0.7 | 0.7 | 0.66 |
| AUA | 1.05 | 1.09 | 1.05 | 1.09 | 1.09 | 1.1 |
| Met | AUG | 1 | 1 | 1 | 1 | 1 | 1 |
| Val | GUU | 1.41 | 1.42 | 1.31 | 1.42 | 1.42 | 1.39 |
| GUC | 0.71 | 0.73 | 0.72 | 0.73 | 0.72 | 0.66 |
| GUA | 1.22 | 1.2 | 1.25 | 1.2 | 1.2 | 1.27 |
| GUG | 0.66 | 0.66 | 0.72 | 0.66 | 0.66 | 0.68 |
| Ser | UCU | 1.47 | 1.39 | 1.46 | 1.39 | 1.4 | 1.48 |
| UCC | 1.06 | 1.15 | 1.12 | 1.15 | 1.15 | 1.08 |
| UCA | 1.17 | 1.24 | 1.18 | 1.24 | 1.23 | 1.28 |
| UCG | 0.78 | 0.72 | 0.77 | 0.72 | 0.72 | 0.77 |
| AGU | 1.14 | 1.04 | 1.01 | 1.04 | 1.04 | 1.14 |
| AGC | 0.95 | 1.01 | 1.02 | 1.01 | 1.01 | 0.97 |
| Pro | CCU | 1.23 | 1.25 | 1.25 | 1.25 | 1.26 | 1.21 |
| CCC | 0.69 | 0.7 | 0.71 | 0.7 | 0.69 | 0.68 |
| CCA | 1.27 | 1.14 | 1.2 | 1.14 | 1.14 | 1.19 |
| CCG | 0.92 | 0.99 | 0.96 | 0.99 | 0.99 | 1 |
| Thr | ACU | 1.14 | 1.17 | 1.18 | 1.17 | 1.17 | 1.21 |
| ACC | 0.67 | 0.7 | 0.66 | 0.7 | 0.7 | 0.6 |
| ACA | 1.34 | 1.32 | 1.29 | 1.32 | 1.32 | 1.23 |
| ACG | 0.92 | 0.95 | 0.94 | 0.95 | 0.95 | 0.93 |
| Ala | GCU | 1.1 | 1.13 | 1.06 | 1.13 | 1.13 | 1.22 |
| GCC | 0.64 | 0.6 | 0.71 | 0.6 | 0.6 | 0.61 |
| GCA | 1.41 | 1.33 | 1.39 | 1.33 | 1.33 | 1.39 |
| GCG | 0.59 | 0.67 | 0.61 | 0.67 | 0.67 | 0.61 |
| Tyr | UAU | 1.31 | 1.31 | 1.32 | 1.31 | 1.31 | 1.26 |
| UAC | 0.69 | 0.7 | 0.78 | 0.7 | 0.7 | 0.75 |
| ✱ | UAA | 1.43 | 1.38 | 1.44 | 1.38 | 1.38 | 1.44 |
| UAG | 0.57 | 0.62 | 0.56 | 0.62 | 0.62 | 0.56 |
| UGA | 1.43 | 1.39 | 1.37 | 1.39 | 1.39 | 1.42 |
| His | CAU | 0.57 | 0.61 | 0.63 | 0.61 | 0.61 | 0.58 |
| CAC | 1.44 | 1.42 | 1.41 | 1.42 | 1.42 | 1.41 |
| Gln | CAA | 0.56 | 0.58 | 0.59 | 0.58 | 0.58 | 0.59 |
| CAG | 1.42 | 1.36 | 1.36 | 1.36 | 1.36 | 1.42 |
| Asn | AAU | 0.58 | 0.64 | 0.64 | 0.64 | 0.64 | 0.58 |
| AAC | 1.46 | 1.44 | 1.42 | 1.44 | 1.44 | 1.46 |
| Lys | AAA | 0.54 | 0.56 | 0.58 | 0.56 | 0.56 | 0.54 |
| AAG | 1.37 | 1.37 | 1.35 | 1.37 | 1.37 | 1.41 |
| Asp | GAU | 0.63 | 0.63 | 0.65 | 0.63 | 0.63 | 0.59 |
| GAC | 1.26 | 1.25 | 1.27 | 1.25 | 1.25 | 1.3 |
| Glu | GAA | 0.74 | 0.75 | 0.73 | 0.75 | 0.75 | 0.7 |
| GAG | 1 | 1 | 0.9 | 1 | 1 | 0.99 |
| Cys | UGU | 1 | 1 | 1 | 1 | 1 | 1 |
| UGC | 0.74 | 0.66 | 0.8 | 0.66 | 0.66 | 0.72 |
| Trp | UGG | 0.45 | 0.49 | 0.46 | 0.49 | 0.49 | 0.51 |
| Arg | CGU | 1.11 | 1.06 | 1.06 | 1.06 | 1.07 | 1.04 |
| CGC | 0.77 | 0.74 | 0.75 | 0.74 | 0.74 | 0.73 |
| CGA | 0.91 | 0.89 | 0.83 | 0.89 | 0.89 | 0.87 |
| CGG | 0.62 | 0.61 | 0.63 | 0.61 | 0.61 | 0.51 |
| AGA | 1.86 | 1.93 | 1.86 | 1.93 | 1.93 | 1.9 |
| AGG | 1.08 | 1.11 | 1.06 | 1.11 | 1.11 | 1.09 |
| Gly | GGU | 0.92 | 0.96 | 1.03 | 0.96 | 0.96 | 1.07 |
| GGC | 0.66 | 0.64 | 0.61 | 0.64 | 0.64 | 0.63 |
| GGA | 1.42 | 1.38 | 1.44 | 1.38 | 1.38 | 1.35 |
| GGG | 1 | 1.02 | 0.92 | 1.02 | 1.02 | 0.95 |

|  |  | **Ralls** | | | **Red Fuji** | | | | | | | |
| --- | --- | --- | --- | --- | --- | --- | --- | --- | --- | --- | --- | --- |
| Phe | UUU | 1.25 | 1.25 | 1.23 | 1.25 | 1.23 | 1.23 | 1.23 | 1.23 | 1.25 | 1.23 | 1.23 |
| UUC | 0.75 | 0.75 | 0.77 | 0.75 | 0.77 | 0.77 | 0.77 | 0.77 | 0.75 | 0.77 | 0.77 |
| Leu | UUA | 1.43 | 1.43 | 1.47 | 1.43 | 1.32 | 1.32 | 1.32 | 1.32 | 1.43 | 1.32 | 1.32 |
| UUG | 1.25 | 1.25 | 1.2 | 1.25 | 1.23 | 1.23 | 1.23 | 1.23 | 1.25 | 1.23 | 1.23 |
| CUU | 1.18 | 1.18 | 1.16 | 1.18 | 1.23 | 1.23 | 1.23 | 1.23 | 1.18 | 1.23 | 1.23 |
| CUC | 0.75 | 0.75 | 0.72 | 0.75 | 0.76 | 0.76 | 0.76 | 0.76 | 0.75 | 0.76 | 0.76 |
| CUA | 0.86 | 0.86 | 0.93 | 0.86 | 0.89 | 0.89 | 0.89 | 0.89 | 0.85 | 0.89 | 0.89 |
| CUG | 0.54 | 0.54 | 0.52 | 0.54 | 0.57 | 0.57 | 0.57 | 0.57 | 0.54 | 0.57 | 0.57 |
| Ile | AUU | 1.21 | 1.21 | 1.23 | 1.21 | 1.22 | 1.22 | 1.22 | 1.22 | 1.21 | 1.22 | 1.22 |
| AUC | 0.7 | 0.7 | 0.72 | 0.7 | 0.73 | 0.73 | 0.73 | 0.73 | 0.7 | 0.73 | 0.73 |
| AUA | 1.09 | 1.09 | 1.05 | 1.09 | 1.05 | 1.05 | 1.05 | 1.05 | 1.09 | 1.05 | 1.05 |
| Met | AUG | 1 | 1 | 1 | 1 | 1 | 1 | 1 | 1 | 1 | 1 | 1 |
| Val | GUU | 1.42 | 1.42 | 1.38 | 1.42 | 1.31 | 1.31 | 1.31 | 1.31 | 1.42 | 1.31 | 1.31 |
| GUC | 0.72 | 0.72 | 0.67 | 0.72 | 0.72 | 0.72 | 0.72 | 0.72 | 0.73 | 0.72 | 0.72 |
| GUA | 1.2 | 1.2 | 1.26 | 1.2 | 1.25 | 1.25 | 1.25 | 1.25 | 1.2 | 1.25 | 1.25 |
| GUG | 0.66 | 0.66 | 0.69 | 0.66 | 0.72 | 0.72 | 0.72 | 0.72 | 0.66 | 0.72 | 0.72 |
| Ser | UCU | 1.4 | 1.4 | 1.42 | 1.4 | 1.46 | 1.46 | 1.46 | 1.46 | 1.39 | 1.46 | 1.46 |
| UCC | 1.15 | 1.15 | 1.11 | 1.15 | 1.12 | 1.12 | 1.12 | 1.12 | 1.15 | 1.12 | 1.12 |
| UCA | 1.23 | 1.23 | 1.35 | 1.23 | 1.18 | 1.18 | 1.18 | 1.18 | 1.24 | 1.18 | 1.18 |
| UCG | 0.72 | 0.72 | 0.74 | 0.72 | 0.77 | 0.77 | 0.77 | 0.77 | 0.72 | 0.77 | 0.77 |
| AGU | 1.04 | 1.04 | 1.05 | 1.04 | 1.01 | 1.01 | 1.01 | 1.01 | 1.04 | 1.01 | 1.01 |
| AGC | 1.01 | 1.01 | 1.05 | 1.01 | 1.02 | 1.02 | 1.02 | 1.02 | 1.01 | 1.02 | 1.02 |
| Pro | CCU | 1.26 | 1.26 | 1.21 | 1.26 | 1.25 | 1.25 | 1.25 | 1.25 | 1.25 | 1.25 | 1.25 |
| CCC | 0.69 | 0.69 | 0.7 | 0.69 | 0.71 | 0.71 | 0.71 | 0.71 | 0.7 | 0.71 | 0.71 |
| CCA | 1.14 | 1.14 | 1.17 | 1.14 | 1.2 | 1.2 | 1.2 | 1.2 | 1.14 | 1.2 | 1.2 |
| CCG | 0.99 | 0.99 | 0.93 | 0.99 | 0.96 | 0.96 | 0.96 | 0.96 | 0.99 | 0.96 | 0.96 |
| Thr | ACU | 1.17 | 1.17 | 1.25 | 1.17 | 1.18 | 1.18 | 1.18 | 1.18 | 1.17 | 1.18 | 1.18 |
| ACC | 0.7 | 0.7 | 0.65 | 0.7 | 0.66 | 0.66 | 0.66 | 0.66 | 0.7 | 0.66 | 0.66 |
| ACA | 1.32 | 1.32 | 1.25 | 1.32 | 1.29 | 1.29 | 1.29 | 1.29 | 1.32 | 1.29 | 1.29 |
| ACG | 0.95 | 0.95 | 0.89 | 0.95 | 0.94 | 0.94 | 0.94 | 0.94 | 0.95 | 0.94 | 0.94 |
| Ala | GCU | 1.13 | 1.13 | 1.12 | 1.13 | 1.06 | 1.06 | 1.06 | 1.06 | 1.13 | 1.06 | 1.06 |
| GCC | 0.6 | 0.6 | 0.73 | 0.6 | 0.71 | 0.71 | 0.71 | 0.71 | 0.6 | 0.71 | 0.71 |
| GCA | 1.33 | 1.33 | 1.37 | 1.33 | 1.39 | 1.39 | 1.39 | 1.39 | 1.33 | 1.39 | 1.39 |
| GCG | 0.67 | 0.67 | 0.63 | 0.67 | 0.61 | 0.61 | 0.61 | 0.61 | 0.67 | 0.61 | 0.61 |
| Tyr | UAU | 1.31 | 1.31 | 1.28 | 1.31 | 1.32 | 1.32 | 1.32 | 1.32 | 1.31 | 1.32 | 1.32 |
| UAC | 0.7 | 0.7 | 0.78 | 0.7 | 0.78 | 0.78 | 0.78 | 0.78 | 0.7 | 0.78 | 0.78 |
| ✱ | UAA | 1.38 | 1.38 | 1.38 | 1.38 | 1.44 | 1.44 | 1.44 | 1.44 | 1.38 | 1.44 | 1.44 |
| UAG | 0.62 | 0.62 | 0.62 | 0.62 | 0.56 | 0.56 | 0.56 | 0.56 | 0.62 | 0.56 | 0.56 |
| UGA | 1.39 | 1.39 | 1.38 | 1.39 | 1.37 | 1.37 | 1.37 | 1.37 | 1.39 | 1.37 | 1.37 |
| His | CAU | 0.61 | 0.61 | 0.62 | 0.61 | 0.63 | 0.63 | 0.63 | 0.63 | 0.61 | 0.63 | 0.63 |
| CAC | 1.42 | 1.42 | 1.41 | 1.42 | 1.41 | 1.41 | 1.41 | 1.41 | 1.42 | 1.41 | 1.41 |
| Gln | CAA | 0.58 | 0.58 | 0.59 | 0.58 | 0.59 | 0.59 | 0.59 | 0.59 | 0.58 | 0.59 | 0.59 |
| CAG | 1.36 | 1.36 | 1.39 | 1.36 | 1.36 | 1.36 | 1.36 | 1.36 | 1.36 | 1.36 | 1.36 |
| Asn | AAU | 0.64 | 0.64 | 0.61 | 0.64 | 0.64 | 0.64 | 0.64 | 0.64 | 0.64 | 0.64 | 0.64 |
| AAC | 1.44 | 1.44 | 1.42 | 1.44 | 1.42 | 1.42 | 1.42 | 1.42 | 1.44 | 1.42 | 1.42 |
| Lys | AAA | 0.56 | 0.56 | 0.58 | 0.56 | 0.58 | 0.58 | 0.58 | 0.58 | 0.56 | 0.58 | 0.58 |
| AAG | 1.37 | 1.37 | 1.37 | 1.37 | 1.35 | 1.35 | 1.35 | 1.35 | 1.37 | 1.35 | 1.35 |
| Asp | GAU | 0.63 | 0.63 | 0.63 | 0.63 | 0.65 | 0.65 | 0.65 | 0.65 | 0.63 | 0.65 | 0.65 |
| GAC | 1.25 | 1.25 | 1.25 | 1.25 | 1.27 | 1.27 | 1.27 | 1.27 | 1.25 | 1.27 | 1.27 |
| Glu | GAA | 0.75 | 0.75 | 0.75 | 0.75 | 0.73 | 0.73 | 0.73 | 0.73 | 0.75 | 0.73 | 0.73 |
| GAG | 1 | 1 | 0.93 | 1 | 0.9 | 0.9 | 0.9 | 0.9 | 1 | 0.9 | 0.9 |
| Cys | UGU | 1 | 1 | 1 | 1 | 1 | 1 | 1 | 1 | 1 | 1 | 1 |
| UGC | 0.66 | 0.66 | 0.78 | 0.66 | 0.8 | 0.8 | 0.8 | 0.8 | 0.66 | 0.8 | 0.8 |
| Trp | UGG | 0.49 | 0.49 | 0.45 | 0.49 | 0.46 | 0.46 | 0.46 | 0.46 | 0.49 | 0.46 | 0.46 |
| Arg | CGU | 1.07 | 1.07 | 1.07 | 1.07 | 1.06 | 1.06 | 1.06 | 1.06 | 1.06 | 1.06 | 1.06 |
| CGC | 0.74 | 0.74 | 0.73 | 0.74 | 0.75 | 0.75 | 0.75 | 0.75 | 0.74 | 0.75 | 0.75 |
| CGA | 0.89 | 0.89 | 0.81 | 0.89 | 0.83 | 0.83 | 0.83 | 0.83 | 0.89 | 0.83 | 0.83 |
| CGG | 0.61 | 0.61 | 0.56 | 0.61 | 0.63 | 0.63 | 0.63 | 0.63 | 0.61 | 0.63 | 0.63 |
| AGA | 1.93 | 1.93 | 1.97 | 1.93 | 1.86 | 1.86 | 1.86 | 1.86 | 1.93 | 1.86 | 1.86 |
| AGG | 1.11 | 1.11 | 0.99 | 1.11 | 1.06 | 1.06 | 1.06 | 1.06 | 1.11 | 1.06 | 1.06 |
| Gly | GGU | 0.96 | 0.96 | 1.04 | 0.96 | 1.03 | 1.03 | 1.03 | 1.03 | 0.96 | 1.03 | 1.03 |
| GGC | 0.64 | 0.64 | 0.56 | 0.64 | 0.61 | 0.61 | 0.61 | 0.61 | 0.64 | 0.61 | 0.61 |
| GGA | 1.38 | 1.38 | 1.5 | 1.38 | 1.44 | 1.44 | 1.44 | 1.44 | 1.38 | 1.44 | 1.44 |
| GGG | 1.02 | 1.02 | 0.9 | 1.02 | 0.92 | 0.92 | 0.92 | 0.92 | 1.02 | 0.92 | 0.92 |
